# 1 ABC transporters alter plant-microbe-parasite 2 interactions in the rhizosphere

3

4 Deborah Cox<sup>1+</sup>, Steven Dyer<sup>1+</sup>, Ryan Weir<sup>1</sup>, Xavier Cheseto<sup>2</sup>, Matthew Sturrock<sup>1</sup>, Danny Coyne<sup>3</sup>,  
5 Baldwyn Torto<sup>2</sup>, Aaron G. Maule<sup>1</sup> and Johnathan J. Dalzell<sup>1\*</sup>

6

7 <sup>1</sup>School of Biological Sciences, Institute for Global Food Security, Queen's University Belfast.

8 <sup>2</sup>The International Center of Insect Physiology and Ecology, Nairobi, Kenya.

9 <sup>3</sup>The International Institute for Tropical Agriculture, Nairobi, Kenya.

10

11 <sup>+</sup>Joint first authors

12 <sup>\*</sup>Corresponding author: [j.dalzell@qub.ac.uk](mailto:j.dalzell@qub.ac.uk)

13

14 Keywords: Plant parasitic nematode; *Meloidogyne incognita*; *Meloidogyne javanica*;  
15 *Globodera pallida*; Plant growth-promoting bacteria (PGPR); *Bacillus subtilis*; *Agrobacterium*  
16 *tumefaciens*; ABC transporter; chemosensation; host-finding; root exudate; Virus induced  
17 gene silencing; VIGS; RNAi

18

## 19 Abstract

20 Plants are master regulators of rhizosphere ecology, secreting a complex mixture of compounds into  
21 the soil, collectively termed plant root exudate. Root exudate composition is highly dynamic and  
22 functional, mediating interactions between plants and a wide range of beneficial / harmful soil  
23 organisms. Exudate composition is under selective pressure to diversify in response to pathogen  
24 perception, whilst maintaining interactions with beneficial organisms. However, crop domestication  
25 has exerted significant and unintended changes to crop root exudate composition, and we know very  
26 little about genotype - phenotype linkages that pertain to root exudates and rhizosphere interactions.  
27 Better understanding could enable the modulation of root exudate composition for crop improvement  
28 by promoting positive, and impeding negative, interactions. Root expressed transporters modulate  
29 exudate composition and could be manipulated towards the rational design of beneficial root exudate  
30 profiles. Using Virus Induced Gene silencing (VIGS), we demonstrate that knockdown of two root-  
31 expressed ABC transporter genes in tomato cv. Moneymaker, *ABC-G33* and *ABC-C6*, alters the

32 composition of semi-volatile compounds in collected root exudates. Root exudate chemotaxis assays  
33 demonstrate that knockdown of each transporter gene triggers the repulsion of economically relevant  
34 *Meloidogyne* and *Globodera* spp. plant parasitic nematodes, which are attracted to control treatment  
35 root exudates. Knockdown of *ABC-C6* inhibits egg hatching of *Meloidogyne* and *Globodera* spp.,  
36 relative to controls. Knockdown of *ABC-G33* has no impact on egg hatching of *Meloidogyne* spp. but  
37 has a substantial inhibitory impact on egg hatching of *G. pallida*. *ABC-C6* knockdown has no impact  
38 on the attraction of the plant pathogen *Agrobacterium tumefaciens*, or the plant growth promoting  
39 *Bacillus subtilis*, relative to controls. Silencing *ABC-G33* induces a statistically significant reduction in  
40 attraction of *B. subtilis*, with no impact on attraction of *A. tumefaciens*. *ABC-C6* represents a promising  
41 target for breeding or biotechnology intervention strategies as gene knockdown (-64.9%) leads to the  
42 repulsion of economically important plant parasites and retains attraction of the beneficial  
43 rhizobacterium *B. subtilis*. This study exposes the link between ABC transporters, root exudate  
44 composition, and *ex planta* interactions with agriculturally and economically relevant rhizosphere  
45 organisms, paving the way for an entirely new approach to rhizosphere engineering and crop  
46 protection.

47

## 48 **Introduction**

49 Plants secrete a complex mixture of water soluble and volatile organic compounds (VOCs) into the  
50 soil, collectively termed plant root exudate. Root exudates can enhance the recruitment of beneficial  
51 microbes (Kim et al., 2016; Li et al., 2016; Allard-Massicotte et al., 2016; Yuan et al., 2015; Badri et al.,  
52 2009), mobilise nutrients (Waters et al., 2018), sequester toxic compounds in the soil (De Andrade et  
53 al. 2011), and communicate with other plants, and animals (Hiltbold et al. 2010; Bertin et al., 2003).  
54 Root exudate composition is dynamic, and can be modulated as a factor of development (Chaparro et  
55 al. 2013; Byrne et al., 2001), environment (Giles et al., 2017), physiological state (Badri et al., 2009),  
56 and displays marked diversity between species (Zwetsloot et al., 2018; Bowsher et al., 2016; Cieslinski  
57 et al., 1997; Fletcher and Hegde, 1995) and cultivars (Mohemed et al., 2018; Kihika et al., 2017;  
58 Monchgesang et al., 2017 & 2016; Micallef et al., 2009). It is estimated that between 5% and 21% of  
59 all photosynthetically-assimilated carbon is released as root exudate (Jones et al. 2009; Marschner,  
60 1995).

61 The process of crop domestication has focused on a small number of desirable traits, relating  
62 to plant stature, yield and disease resistance (Meyer et al., 2012) often at the expense of other traits.  
63 For example, there is evidence that the domestication process has exerted a significant and  
64 unintended impact on root exudate composition, and rhizosphere microbe interactions (Iannucci et  
65 al., 2017; Bulgarelli et al., 2015). A general lack of understanding and mechanistic insight represents a

66 major impediment to the exploitation of root exudates for crop improvement. However, it is clear that  
67 root exudate composition is an adaptive trait, which can be manipulated. For example, much progress  
68 has been made in understanding the interaction between root exudates, and parasitic *Striga* spp. over  
69 recent years. This insight has underpinned efforts to alter exudate strigolactone content, a known  
70 germination stimulant and attractant of these economically important and globally distributed  
71 parasitic plants (Mohemed et al., 2018; Xu et al., 2018; Gobena et al., 2017; Mohemed et al., 2016;  
72 Jamil et al., 2012). Comparatively, less progress has been made in understanding the analogous  
73 interaction between root exudate and plant parasitic nematodes (PPNs), in part due to the increased  
74 complexity of nematode biology. Nonetheless, recent years have seen renewed interest in this field  
75 of research (Čepulytė et al., 2018; Hoysted et al., 2018; Murungi et al., 2018; Kirwa et al., 2018; Kihika  
76 et al., 2017; Warnock et al., 2016).

77 It is estimated that PPNs reduce crop yields by 12.3%, equating to an estimated \$US 80 - 157  
78 billion in losses each year (Coyne et al., 2018; Jones et al., 2013; Nicol et al., 2011). PPNs respond  
79 transcriptionally, physiologically and behaviourally to plant root exudates, using exudates to trigger  
80 egg hatching, and to facilitate host-finding (Cepulyte et al., 2018; Palomares-Rius et al., 2016;  
81 Warnock et al., 2016; Yang et al. 2016; Zasada et al., 2016; Duarte et al., 2015; Teillet et al., 2013).  
82 Understanding the molecular, chemical and physiological mechanisms underpinning both root  
83 exudation and PPN interactions could facilitate the development of aggressive new *ex planta* control  
84 strategies for sustainable intensification of global agriculture, through breeding, rhizosphere  
85 engineering and / or biotechnology (Ahkami et al., 2017; Warnock et al., 2017; Dessaux et al., 2016;  
86 Devine and Jones, 2001). The identification of key parasite attractants and repellents could also  
87 facilitate the development of new push-pull strategies.

88 The rhizosphere microbiome is also a major contributing factor to crop health (Sasse et al.,  
89 2018; Berendsen et al., 2012), and phenotype (Hubbard et al., 2018; Lu et al., 2018). Microbial  
90 chemotaxis to plant root exudates is an important factor in the competition for chemical resources in  
91 the rhizosphere, and colonisation of plant roots (Allard-Massicotte et al., 2016; de Weert et al., 2002).  
92 As such, alteration of root exudate composition could impact on a wide range of interactions.  
93 Exploitation of root exudates for improved crop health offers intriguing potential, but requires a  
94 detailed study of the link between crop genotype and highly complex, multi-species interactions.

95 Considerable interest has developed around the manipulation of membrane transporters for  
96 crop improvement (Lane et al., 2016; Schroeder et al., 2013), and ABC transporters have been  
97 implicated directly in modifying root exudate composition (Badri et al., 2008, 2009). ABC transporters  
98 represent one of the single largest gene families in plants, which regulate the sequestration and  
99 mobilisation of a vast array of chemistry linked to diverse metabolic, physiological and morphological

100 functions (Adebesin et al., 2017; Hwang et al., 2016; Martinoia et al., 2012; Yazaki et al., 2006; Liu et  
101 al., 2001). The ABC transporter gene complement of tomato is numbered at 154, with a considerable  
102 proportion expressed in root tissue (Ofori et al., 2018). Here we have employed an improved Virus  
103 Induced Gene Silencing (VIGS) method to reveal a functional link between two ABC transporter genes,  
104 root exudate composition, and rhizosphere interactions with economically important microbes and  
105 parasites.

106

## 107 **Results**

### 108 **Knockdown of tomato ABC transporter genes by VIGS**

109 VIGS was used to co-silence two genes of interest (*ABC-C6* or *ABC-G33*), alongside a visual reporter  
110 gene, Phytoene DeSaturase (*PDS*). Knockdown of *PDS* triggers a mild leaf bleaching phenotype (Winzer  
111 et al., 2012). Co-silencing was necessary to identify responsive plants for exudate collection and  
112 downstream bioassays; not all plants will trigger a viable RNAi response to VIGS challenge. We  
113 observed that plant growth rate was reduced by over 75% relative to control treatments when using  
114 the traditional blunt syringe inoculation method. We therefore sought to develop a less damaging  
115 approach to inoculation of *A. tumefaciens* (containing the VIGS plasmids). We discovered that *A.*  
116 *tumefaciens* cultures could efficiently invade leaf cells when applied topically to tomato seedling  
117 cotyledons with Silwett L-77, which is frequently used to aid *A. tumefaciens* invasion during floral dip  
118 transformation protocols (Clough & Bent, 1998). Following topical application of *A. tumefaciens*  
119 (containing the VIGS plasmids), we did not observe any reduction in plant growth rate, and bleaching  
120 phenotypes typically began to develop within 11 days and peaked at around 21 days post inoculation.  
121 Bleaching phenotypes following blunt syringe application began to emerge around 15 days post  
122 inoculation, and similarly peaked around 21 days post inoculation. Furthermore, the frequency of  
123 plants demonstrating the mild photobleaching phenotype associated with *PDS* knockdown was  
124 between 80% and 100% following topical application. The blunt syringe leaf infiltration method  
125 resulted in around 75% of plants demonstrating the co-silenced bleaching phenotype.

126 Both inoculation methods triggered robust and specific gene knockdown by week three post  
127 inoculation (Figure 1). Plants were sampled three weeks post inoculation for further experiments.  
128 Transcript abundance of *ABC-C6* and *ABC-G33* was reduced by  $63.3\% \pm 11.6\%$  ( $P < 0.01^{**}$ ) and  $66.3\% \pm$   
129  $8.6\%$  ( $P < 0.001^{***}$ ) using blunt syringe inoculation. Topical application resulted in transcript  
130 knockdown of  $64.9\% \pm 9.4\%$  ( $P < 0.01^{**}$ ) and  $46.4\% \pm 5.8\%$  ( $P < 0.001^{***}$ ) for *ABC-C6* and *ABC-G33*  
131 respectively. Due to the improved performance of topical inoculation in terms of plant growth rate,  
132 we adopted this method for all subsequent experiments. Only plants that displayed co-silenced  
133 bleaching phenotypes were taken for further analysis across all experiments.

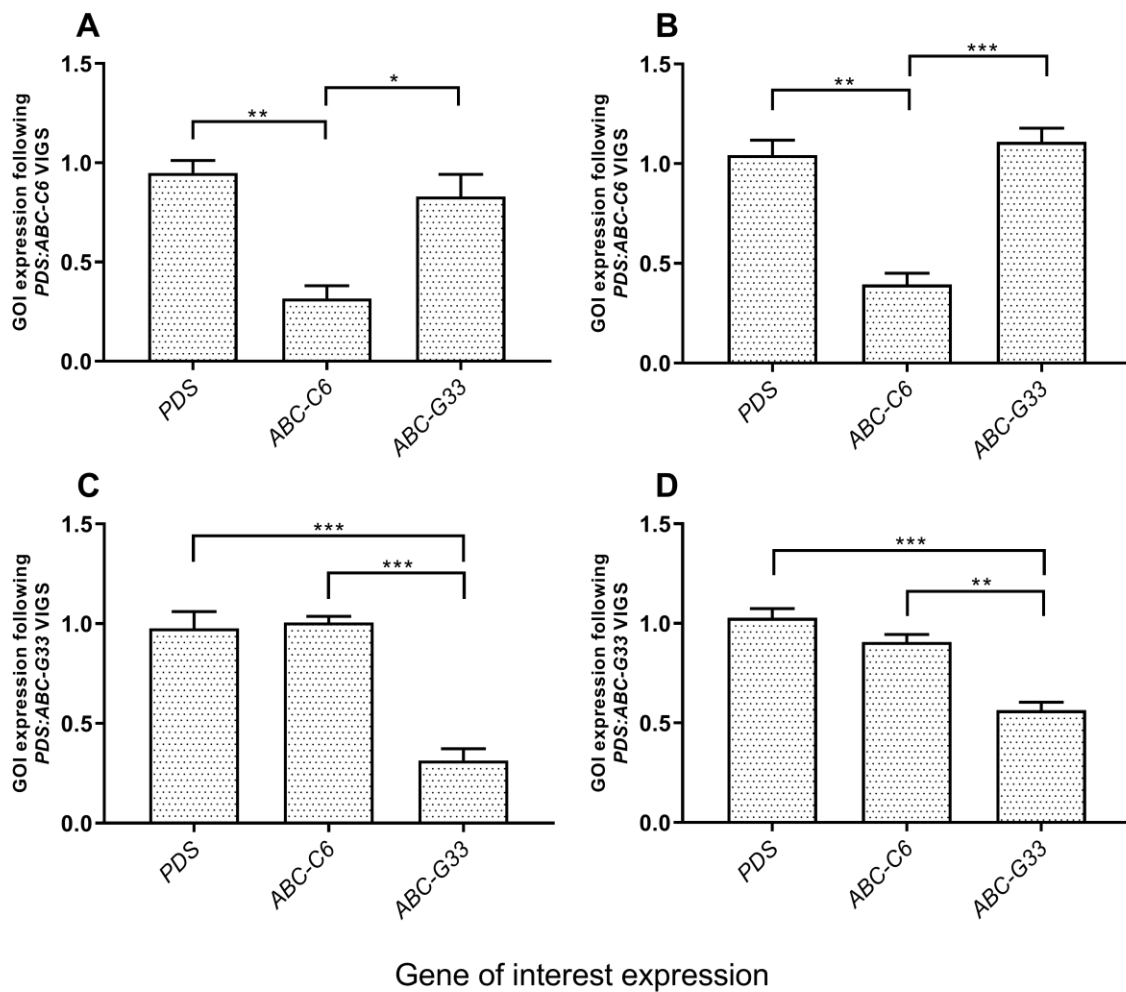

134

135 **Figure 1. VIGS triggers target-specific knockdown of root-expressed ABC transporter genes in**  
136 **tomato.** (A) The mean ratio of *ABC-C6* abundance relative to the endogenous control gene, elongation  
137 factor 1 subunit alpha (*EF-α*), following blunt syringe inoculation of *A. tumefaciens* and pTRV plasmids.  
138 (B) The mean ratio of *ABC-C6* abundance relative to the endogenous control gene following topical  
139 application of *A. tumefaciens* and pTRV plasmids. (C) The mean ratio of *ABC-G33* abundance relative  
140 to the endogenous control gene following blunt syringe inoculation of *A. tumefaciens* and pTRV  
141 plasmids. (D) The mean ratio of *ABC-G33* abundance relative to the endogenous control gene  
142 following topical application of *A. tumefaciens* and pTRV plasmids. Data represent three biological  
143 replicates, with each replicate consisting of three plants each; error bars represent SEM. One-way  
144 ANOVA and Tukey's HSD tests were used to assess statistical significance between groups (P < 0.05\*,  
145 P < 0.01\*\*, P < 0.001\*\*\*).

146

147 **Knockdown of ABC transporter genes modulate exudate composition and parasite behaviour**

148 Root exudate was collected from VIGS treatment groups at three weeks post inoculation. Behavioural  
149 responses of two root knot nematodes, *Meloidogyne incognita* and *Meloidogyne javanica*, alongside  
150 the potato cyst nematode, *Globodera pallida* were assayed across experimental exudates.

151

## 152 **Hatching**

153 The hatching response of each species was measured as the percentage of emerging infective second  
154 stage juveniles (J2s) over time, for which the area under the curve was calculated for comparison of  
155 experimental groups (Figure 2C-E). Measuring the area under the curve allows for a more robust  
156 assessment of hatching phenotypes over time, as it is proportional to both the rate of hatching  
157 (gradient) and also the final hatch percentage. Knockdown of *ABC-C6* and *ABC-G33* triggered a  
158 reduction in final hatch at day 21 of  $11.6\% \pm 3.4$  ( $P < 0.05^*$ ) and  $36.2\% \pm 6.0$  ( $P < 0.001^{***}$ ) respectively  
159 for *G. pallida*. Area under the cumulative percentage hatch (AUCPH) was also reduced following  
160 knockdown of *ABC-C6* and *ABC-G33* by  $174.4 \pm 22.04\%$  days ( $P < 0.001^{***}$ ) and  $420.1 \pm 23.29\%$  days  
161 ( $P < 0.0001^{****}$ ), respectively. Emergence of *Meloidogyne* spp. J2s was assayed by measuring the ratio  
162 of hatched : unhatched J2s in each treatment over time, and converting to a percentage. The AUCPH  
163 was reduced for *M. incognita* following knockdown of *ABC-C6*, by  $33.8 \pm 7.3\%$  days ( $P < 0.01^{**}$ ).  
164 Knockdown of *ABC-G33* caused a hatching reduction of  $16.9 \pm 7.1\%$  days ( $P > 0.05$ , ns). Knockdown of  
165 *ABC-C6* also triggered a reduction in hatching of *M. javanica* of  $112.4 \pm 33.3\%$  days ( $P < 0.05^*$ ), whereas  
166 knockdown of *ABC-G33* led to a reduction of  $59.7 \pm 30.8\%$  days ( $P > 0.05$ , ns).

167

## 168 **Attraction**

169 Knockdown of *ABC-C6* modified the chemosensory responses of *M. incognita* and *M. javanica* to  
170 collected exudates (Figure 2A). Experimentally manipulated exudates were less attractive to *M.*  
171 *incognita* J2s, whereas *M. javanica* J2s were repelled by the same exudates. Following knockdown of  
172 *ABC-C6*, chemosensory indices (CI) were reduced by  $0.31 \pm 0.07$  ( $P < 0.01^{**}$ ) and  $0.57 \pm 0.07$   
173 ( $P < 0.0001^{****}$ ) for *M. incognita* and *M. javanica* respectively, relative to PDS control exudates.  
174 Following knockdown of *ABC-G33*, *M. javanica* was consistently repelled by these exudates with a CI  
175 score reduction of  $0.76 \pm 0.11$  ( $P < 0.0001^{****}$ ), whereas *M. incognita* retained attraction. The CI score  
176 for *M. incognita* to *ABC-G33* exudates was reduced by just  $0.1 \pm 0.01$  ( $P > 0.05$ , ns). *G. pallida* J2s  
177 displayed reduced attraction to exudates from *ABC-G33* knockdown plants, by  $0.32 \pm 0.08$  ( $P < 0.01^{**}$ ),  
178 whereas for *ABC-C6* exudates, the CI was reduced by only  $0.06 \pm 0.06$  ( $P > 0.05$ , ns).

179

## 180 **Plant infection**

181 Knockdown of ABC transporter genes also reduced the number of galls produced following infection  
182 of VIGS plants with *Meloidogyne* spp. (Figure 2b); knockdown of *ABC-C6* and *ABC-G33* caused a  
183 reduction of  $17.7 \pm 4.4$  galls ( $P < 0.0001$ \*\*\*\*) and  $7.5 \pm 4.3$  galls ( $P > 0.05$ , ns) respectively, following  
184 infection with *M. incognita*. The number of galls produced following infection by *M. javanica* was  
185 reduced by  $13.4 \pm 1.8$  ( $P < 0.0001$ \*\*\*\*) and  $8.6 \pm 1.8$  ( $P = 0.0005$ \*\*\*) when *ABC-C6* and *ABC-G33*  
186 knockdown plants were challenged, respectively. The number of *G. pallida* females was reduced by  
187  $3.2 \pm 1.2$  following knockdown of *ABC-C6* ( $P < 0.05$ \*), whereas knockdown of *ABC-G33* caused a  
188 decrease of  $2.3 \pm 1.1$  cysts per plant ( $P > 0.05$ , ns). *G. pallida* retained attraction to exudates collected  
189 following *ABC-C6* knockdown, however cyst counts were significantly reduced following infection of  
190 VIGS plants, indicating that *in planta* consequences of transporter dysregulation can be distinct from  
191 *ex planta* implications (Figure 2c).



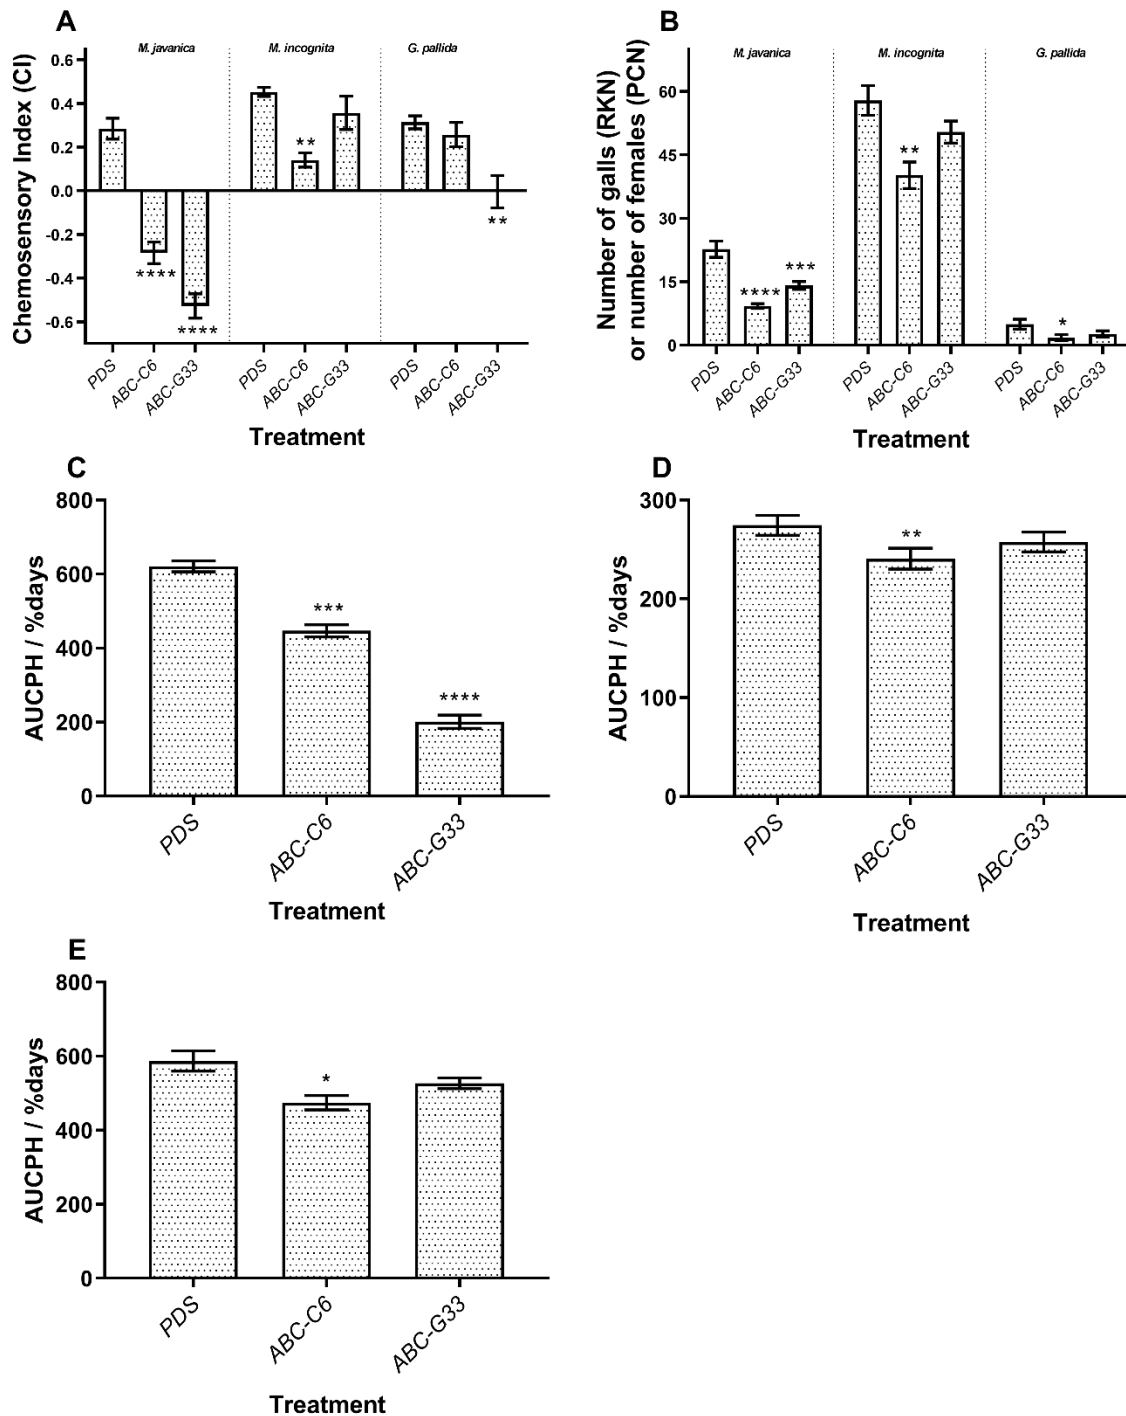

192

193 **Fig. 2. ABC transporter gene knockdown modulates PPN hatching, attraction and invasion. (A)**

194 Chemosensory challenge of *Meloidogyne* and *Globodera* spp. A positive chemosensory index (CI)

195 equates to attraction towards tested exudates, and a negative CI infers repulsion from the exudates.

196 Data represent five biological replicates for each nematode species in each treatment group. (B) The

197 number of galls formed (*Meloidogyne* spp.) or developing females found on the root surface (*G.*

198 *pallida*) six weeks post inoculation on VIGS plants (n=10 plants per species). (C) *G. pallida* J2 hatching



199 was measured as the % of total eggs hatched at two-day intervals over three weeks at 17°C in darkness  
200 when incubated in experimental root exudates (n=4). The area under the curve from the cumulative  
201 percentage hatch (AUCPH) was estimated by trapezoidal integration, as described by Campbell &  
202 Madden (1990). (D) *M. incognita* J2 hatching was calculated as the observed ratio of hatched to  
203 unhatched J2 in a suspension of experimental exudate samples. The area under the curve (AUC) for  
204 these ratios was calculated using trapezoidal integration. (E) Hatching of *M. javanica* was calculated  
205 as above. Error bars represent SEM. Asterisks indicate statistical significance relative to controls  
206 following one-way ANOVA and Tukey's HSD tests: P<0.05\*; P< 0.01\*\*; P< 0.001\*\*\*; P< 0.0001\*\*\*\*.

207

### 208 **Metabolomic characterisation of exudates following ABC transporter knockdown**

209 Collected exudates were assessed by coupled gas chromatography-mass spectrometry (GC-MS) to  
210 identify changes in exudate composition. Several compounds were quantitatively altered in exudates  
211 collected following ABC gene knockdown, relative to *PDS* knockdown controls (Fig 3). Knockdown of  
212 *ABC-C6* resulted in reduced abundance of 2-methyloctacosane (P<0.001\*\*\*), and increased  
213 abundance of nonadecane (P<0.01\*\*) and tetradecanoic acid (P<0.05\*), relative to control treatment  
214 (*PDS* knockdown). Contrastingly, knockdown of *ABC-G33* triggered elevated abundance of eicosane  
215 (P<0.001\*\*\*), 9-O-pivaloyl-N-acetylcolchinol (P<0.001\*\*\*), heptadecane (P<0.05\*) and octadecanoic  
216 acid (P<0.05\*).

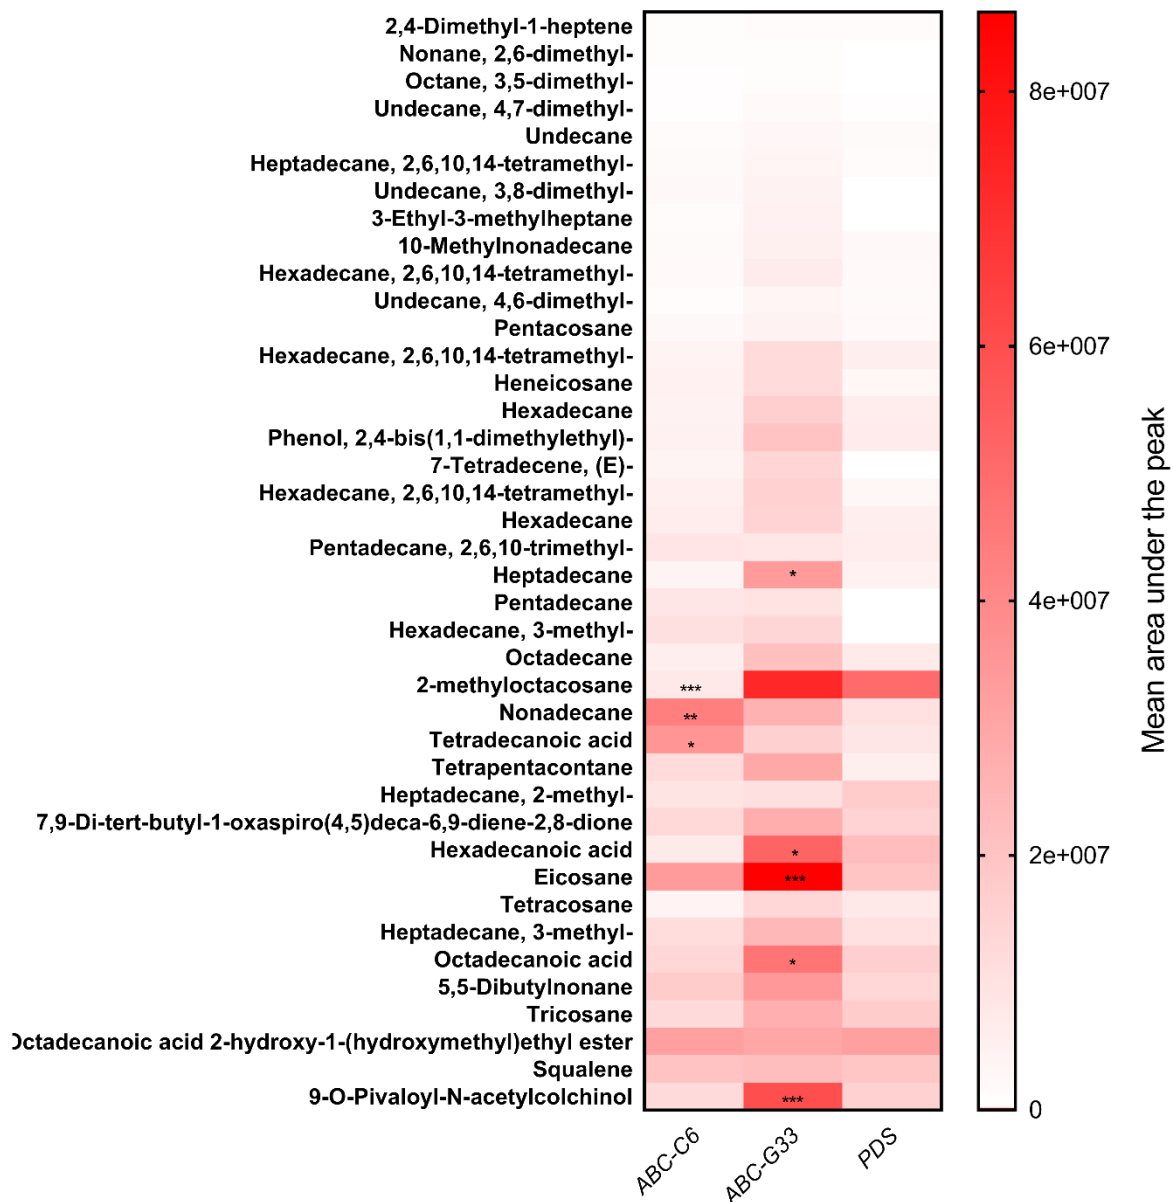

217

218 **Figure 3. Heatmap showing differences in the relative abundance of identified compounds across**  
 219 **experimental exudates.** The mean composition of 10 biological replicates (three plants per replicate)  
 220 is plotted for each experimental group post-VIGS, and has been assessed by two-way ANOVA, and  
 221 Tukey's multiple comparison test. Statistical significance is indicated relative to the *PDS* knockdown  
 222 control,  $P < 0.05$ \*,  $P < 0.01$ \*\*\*,  $P < 0.001$ \*\*\*.

223

### 224 Parasite behavioural responses to selected differentially exuded compounds

225 PPN species were assayed for responsiveness to selected compounds that were differentially exuded  
 226 following knockdown of either ABC transporter gene. Tetradecanoic acid, hexadecanoic acid,  
 227 octadecanoic acid and pentadecane were solubilised in 100% dimethyl sulfoxide (DMSO) (1 mM

228 stocks). Each solubilised compound was independently inoculated into control exudates (*PDS*  
229 knockdown) to a final experimental concentration of 1  $\mu$ M 0.1% DMSO. Inoculated control exudates  
230 were then used for egg hatching and chemotaxis assays (Figure 4).

231 Egg hatching of *Meloidogyne* spp. was enhanced when tetradecanoic acid or octadecanoic  
232 acid were inoculated into *PDS* knockdown exudates. The AUCPH for *M. incognita* increased by  $95 \pm$   
233  $16.82\%$  days ( $P < 0.001^{***}$ ) and  $208.1 \pm 17.22\%$  days ( $P < 0.0001^{****}$ ), respectively (Figure 4A). For *M.*  
234 *javanica* the AUCPH increased by  $101.7 \pm 19.52$  ( $P < 0.001^{***}$ ) and  $71.2 \pm 21.76$  ( $P < 0.05^*$ ), respectively  
235 (Figure 4B). However, the addition of hexadecanoic acid and pentadecane significantly inhibited egg  
236 hatching in *G. pallida* by  $178.7 \pm 65.2\%$  days ( $P < 0.05^*$ ) and  $124.2 \pm 31.8\%$  days ( $P < 0.01^{**}$ ), respectively  
237 (Figure 4c).

238 The addition of 1  $\mu$ M pentadecane to control root exudates reduced the CI of *M. incognita* by  
239  $0.56 \pm 0.10$  ( $P < 0.01^{**}$ ). Likewise, the addition of 1  $\mu$ M hexadecanoic acid reduced the CI of *M.*  
240 *incognita* by  $0.39 \pm 0.12$  ( $P < 0.001^{***}$ ). 1  $\mu$ M tetradecanoic acid, or octadecanoic acid had no  
241 statistically significant impact on *M. incognita* attraction to control root exudates. For *M. javanica*, a  
242  $0.21 \pm 0.1$  ( $P < 0.05^*$ ) decrease in CI was observed upon addition of 1  $\mu$ M pentadecane; no statistically  
243 significant differences were observed following addition of the other compounds. The CI of *G. pallida*  
244 to root exudates was reduced by  $0.36 \pm 0.15$  ( $P < 0.05^*$ ) with the addition of 1  $\mu$ M pentadecane.

245

246

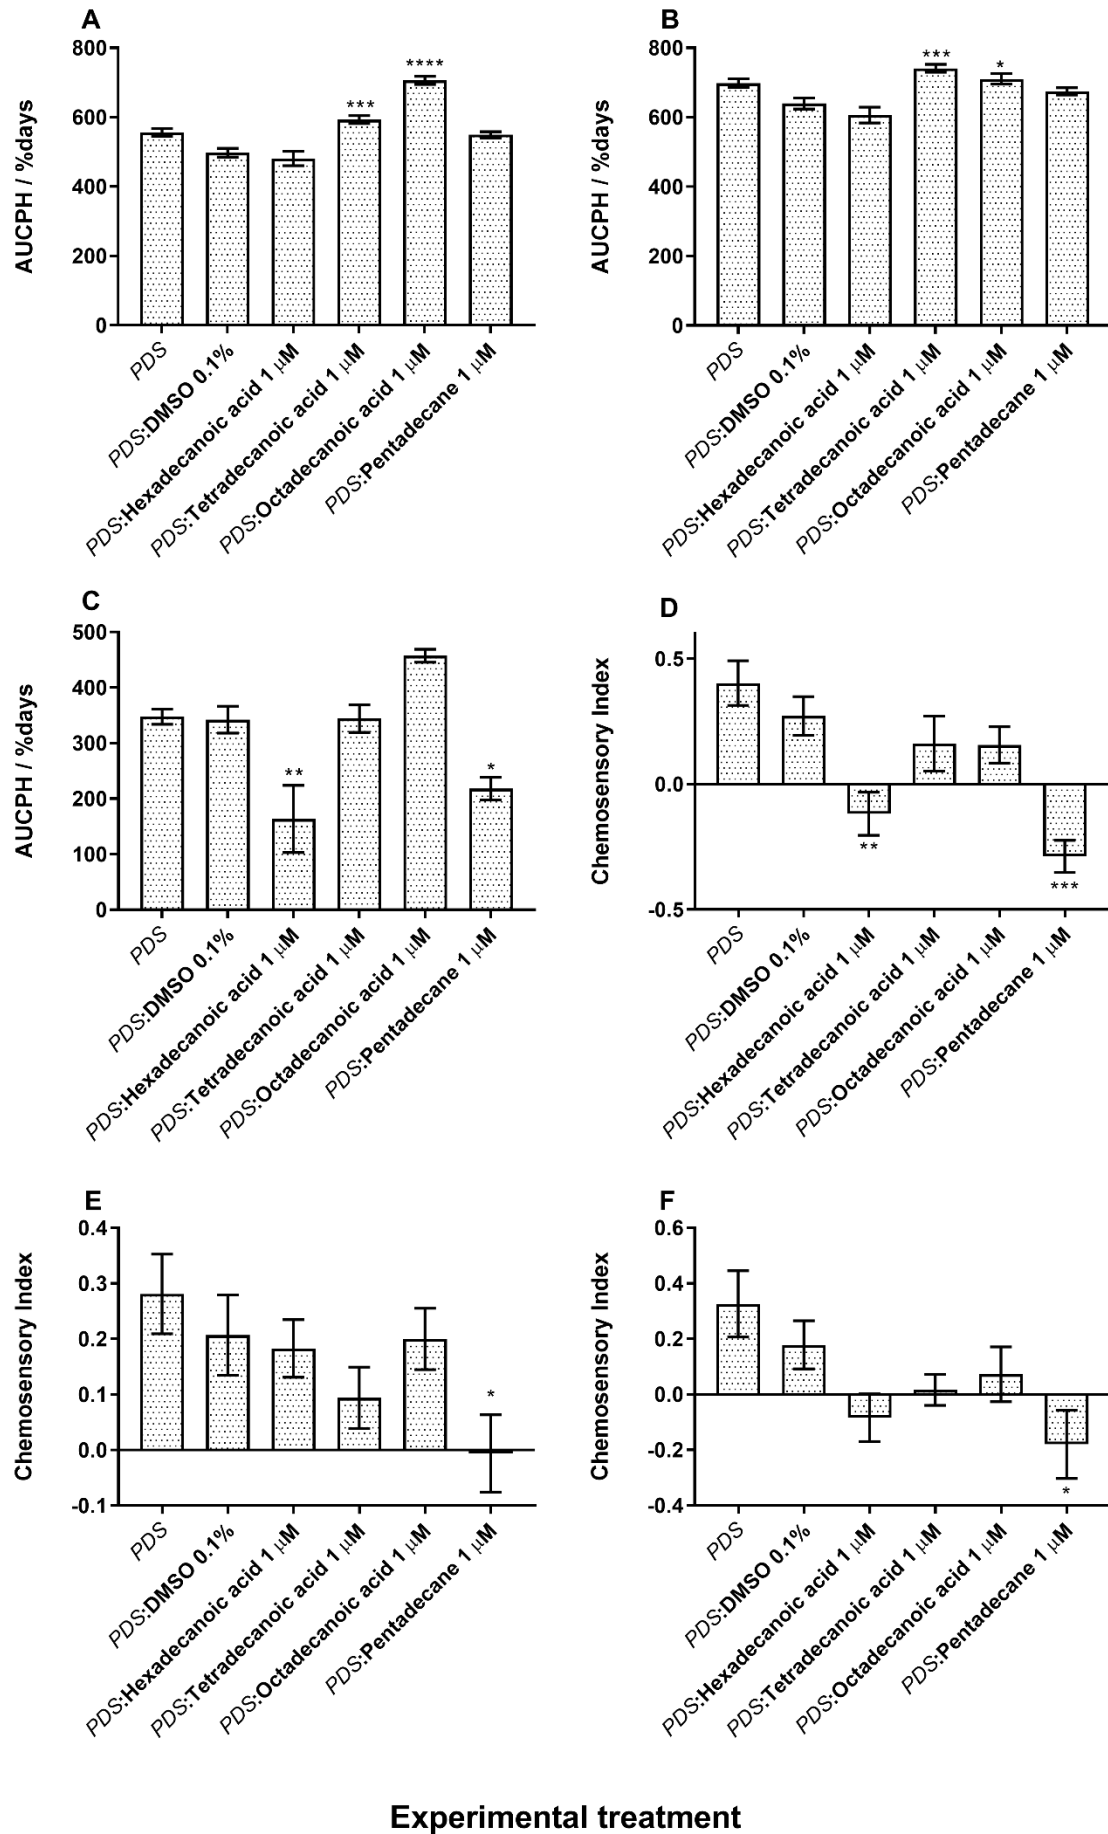

248 **Figure 4. PPN responses to selected exudate compounds.** Hatch responses following inoculation of  
249 control exudate with selected compounds for: (A) *M. incognita*; (B) *M. javanica*; (C) *G. pallida*. The  
250 area under the curve of percentage hatch (AUCPH) was estimated by trapezoidal integration and  
251 compared by one-way ANOVA and Dunnett's multiple comparisons test and asterisks indicate  
252 statistical significance in hatching relative to the PDS:DMSO control. Chemotaxis responses to selected  
253 compounds inoculated into control plant root exudate (*PDS* knockdown treatment) for: (D) *M.*  
254 *incognita*; (E) *M. javanica*; (F) *G. pallida*. Data represent the mean of five biological replicates of root  
255 exudate, for which eight replicate assays are performed for each nematode species. Asterisks indicate  
256 statistical significance in chemosensory index relative to the PDS:DMSO control following one-way  
257 ANOVA and Tukey's HSD tests.  $P < 0.01^{**}$ ;  $P < 0.0001^{****}$ , error bars represent SEM.  $P < 0.001^{***}$ ;  $P <$   
258  $0.0001^{****}$ , error bars represent SEM.

259

#### 260 **Knockdown of ABC transporter genes selectively modulates microbial chemotaxis**

261 The attraction of *B. subtilis* and *A. tumefaciens* to root exudates was assessed following ABC gene  
262 knockdown. Both species were significantly more attracted to the positive control, 1 mM malic acid,  
263 relative to the negative ddH<sub>2</sub>O control. Similarly, root exudates collected from the *PDS* knockdown  
264 plants were significantly more attractive to both *B. subtilis* ( $P < 0.0001^{****}$ ) and *A. tumefaciens*  
265 ( $P < 0.001^{***}$ ), than ddH<sub>2</sub>O (Figure 5). The attraction of *B. subtilis* to exudates collected following  
266 knockdown of *ABC-C6* was statistically unchanged relative to the control treatment. However,  
267 knockdown of *ABC-G33* triggered a reduced attraction, and a mean reduction of 98.9 colony forming  
268 units (CFUs) relative to exudates from *PDS* knockdown plants ( $P < 0.01^{**}$ ). Knockdown of *ABC-C6* and  
269 *ABC-G33* had no impact on the attraction of *A. tumefaciens* to collected exudates.

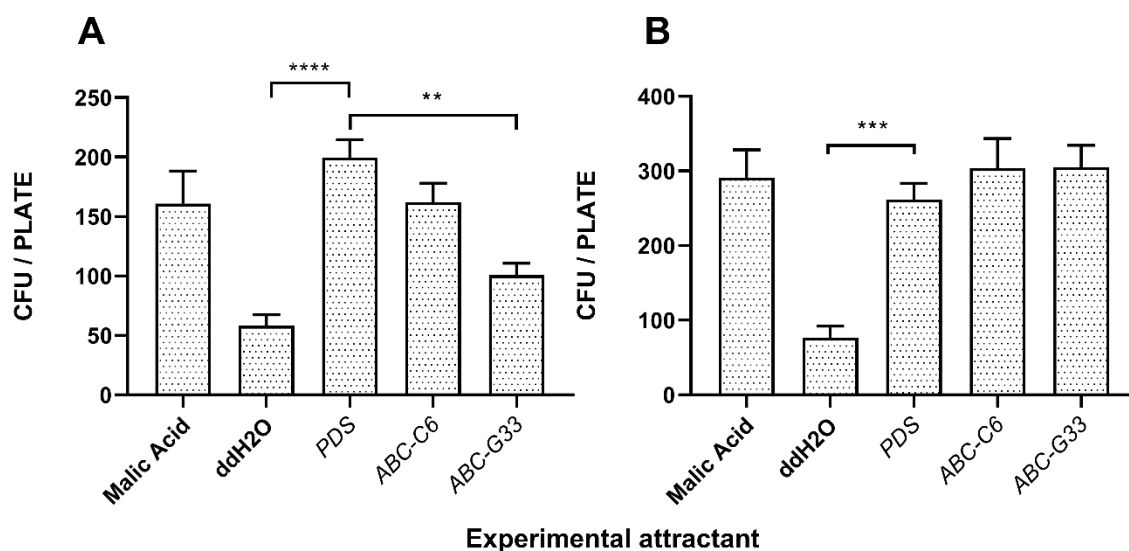

270

271 **Figure 5. ABC transporter gene knockdown modulates the attraction of *B. subtilis*, but not *A.***  
272 ***tumefaciens*.** (A) Chemosensory response of *B. subtilis* (168) to root exudates collected following gene  
273 knockdown. (B) Chemosensory response of *A. tumefaciens* (AGL-1) to root exudates collected  
274 following gene knockdown. Data represent ten biological replicates for each species.  $P < 0.01^{**}$ ;  $P <$   
275  $0.001^{***}$ ;  $P < 0.0001^{****}$ , error bars represent SEM.

276

## 277 Discussion

278 The predominantly sessile life-style of a plant necessitates substantial molecular and biochemical  
279 plasticity to coordinate responses to environmental conditions, and to interact contextually with floral  
280 and faunal communities. It is clear that plant genotype influences exudate composition, and  
281 organismal interactions (Mohemed et al., 2018; Iannucci et al., 2017; Kihika et al., 2017; Monchgesang  
282 et al., 2017 & 2016; Bulgarelli et al., 2015; Micallef et al., 2009). However, our understanding of the  
283 basic biology underpinning these interactions is limited.

284 ABC transporters modulate root exudate composition, and rhizosphere microbe interactions  
285 (Badri et al., 2008, 2009, reviewed in Sasse et al., 2018). In this study, we used VIGS to investigate the  
286 role of two ABC transporter genes, *ABC-C6* and *ABC-G33*, in modulating tomato root exudate  
287 composition, and interactions with three important PPN species. Specifically, we demonstrate that  
288 knockdown of *ABC-C6* and *ABC-G33* transporter genes quantitatively alters tomato root exudate  
289 composition and inhibits PPN hatching and attraction behaviours to varying degrees. We assessed the  
290 involvement of individual compounds in mediating interactions with the PPN species by inoculating  
291 selected, differentially exuded compounds into control exudates. By assessing hatching and  
292 chemotaxis responses to these experimentally manipulated exudates, we demonstrate that  
293 hexadecanoic acid and pentadecane are inhibitors of *G. pallida* host-finding and hatching;  
294 pentadecane is an inhibitor of *Meloidogyne* spp. host-finding. Tetradecanoic acid and octadecanoic  
295 acid had no impact on host-finding of either species but did enhance egg hatching rates of both  
296 *Meloidogyne* spp. These results suggest that hydrocarbons and fatty acids in root exudate both  
297 mediate PPN host finding. However, our findings do not exclude the possibility that other classes of  
298 compounds may play a role in J2 host finding.

299 PPNs are highly damaging parasites with a tremendous impact on agriculture globally.  
300 *Meloidogyne* and *Globodera* spp. employ an extremely sophisticated and adaptive repertoire of  
301 effector molecules to subvert the plant host (reviewed by Mitchum et al., 2013); the complexity and  
302 diversity of these organisms mean that crop Resistance (R) genes are either unavailable, or are  
303 insufficiently durable, to protect crops over the long term (reviewed by Davies and Elling, 2015).  
304 Reliance of synthetic chemical pesticides for their management can also have negative consequences

305 to environmental and human health. Novel approaches, which are safe and effective, are required to  
306 control these parasites. Preventing the act of PPN host-finding and invasion represents an attractive  
307 intervention strategy for crop protection, and one that could be developed through manipulation of  
308 crop root exudate composition. This strategy has been effectively demonstrated against parasitic  
309 plants within the *Striga* genus (Mohemed et al., 2018; Xu et al., 2018; Gobena et al., 2017; Mohemed  
310 et al., 2016; Jamil et al., 2012), and could prevent secondary crop infection events. Our data  
311 demonstrate that crop plant gene expression can be modulated to alter exudate composition, as well  
312 as hatching and attraction of several important PPN species.

313 The GC-MS dataset reveals several compounds that are elevated in root exudates following  
314 ABC gene knockdown. When considering this relative to the behavioural response of PPN species to  
315 the exudates, we would hypothesise that elevated compounds function as repellents. Our behavioural  
316 data corroborate this for hexadecanoic acid, which is elevated following knockdown of *ABC-G33*, and  
317 pentadecane, which is elevated in exudates following knockdown of both *ABC-C6* and *ABC-G33*. Whilst  
318 our analysis of individual compounds has not been exhaustive, these observations do provide some  
319 confidence in our ability to predict exudate compound function using these approaches. It is clear  
320 however, that several of the compounds we selected for subsequent behavioural characterisation  
321 have no influence on PPN behaviour in these assays, and that complex interactions are likely involved.  
322 It should also be noted that root exudates will contain many additional compounds, which cannot be  
323 identified by GC-MS alone.

324 It is increasingly apparent that rhizosphere microbes are vital for plant health, and it has been  
325 shown that microbial chemotaxis is an important factor in the early colonisation of plant roots, and  
326 plant protection (Allard-Massicotte et al., 2016). We assessed the impact that root exudate  
327 compositional changes had on the positive chemotaxis of beneficial (*B. subtilis*) and pathogenic (*A.*  
328 *tumefaciens*) rhizosphere microbes to the experimental exudates. Our results indicate that *A.*  
329 *tumefaciens* was attracted to root exudates irrespective of the compositional changes following  
330 knockdown of either *ABC-C6* or *ABC-G33*. However, *B. subtilis* was significantly less attracted to root  
331 exudates following knockdown of *ABC-G33*. These data indicate that approaches to rhizosphere  
332 engineering, through the manipulation of root exudate composition, will need to assess a wide range  
333 of relevant organismal interactions. In this study, we used the domesticated *B. subtilis* strain 168 as  
334 an experimental model for *B. subtilis* chemotaxis. *B. subtilis* 168 does not form biofilms, unlike the  
335 undomesticated parental strain *B. subtilis* NCIB 3610 (Kesel et al., 2016; Zeigler et al., 2008). We found  
336 that *B. subtilis* NIB 3610 would form biofilms within our chemotaxis assay timeframe, making it difficult  
337 to enumerate individual cells that were attracted between experimental treatments. However, there



338 may be additional implications for plant-microbe interactions, particularly in terms of biofilm and *vir*  
339 gene induction.

340 Our study relies upon a new approach to VIGS inoculation, which uses topical application of  
341 *A. tumefaciens* to seedling leaves, in a suspension containing the non-ionic surfactant and wetting  
342 agent, Silwet-L77. Unlike blunt syringe inoculation, this approach does not trigger growth stunting  
343 effects in the treated plant and promotes longer lasting gene knockdown. In the context of this study,  
344 using a transient gene silencing approach, such as VIGS has several conceptual benefits relative to  
345 other approaches that constitutively inhibit target gene expression. Transient knockdown can limit  
346 downstream secondary impacts in plants relative to constitutively inhibited genes by CRISPR-Cas9 or  
347 transgenic RNAi approaches, which could lead to false positive phenotypes. This phenomenon could  
348 develop as a function of biochemical knock-on effects that manifest phenotypically, but do not relate  
349 exclusively to target gene function, as previously suggested (Badri et al., 2008). Conceptually, we  
350 should have higher confidence in phenotypes recorded at earlier time points following loss of function  
351 analyses, which VIGS can facilitate. VIGS may also minimise genetic compensation, which occurs  
352 through transcriptional rescue of aberrant phenotypes, by counter-balanced expression of related  
353 genes. This can generate false negative phenotypes and is especially prominent in large gene families  
354 approaches (Rossi et al., 2015). Rossi et al. (2015) indicate that genetic compensation can be avoided  
355 or reduced using transient knockdown. VIGS typically results in a lower level of target gene knockdown  
356 than does transgenic dsRNA production and RNAi *in planta* (Albert et al., 2006), which may also reduce  
357 genetic compensation processes. VIGS is extremely cost-effective relative to other functional  
358 genomics approaches, in terms of both reagents and personnel time. It also represents the highest  
359 throughput reverse genetics tool available across a number of crop plants, and can be used to rapidly  
360 probe parasite interactions (Dubreuil et al., 2009). VIGS can also be used to silence multiple genes  
361 simultaneously (Orzaez et al., 2009).

362 Collectively, the data generated in this study support efforts to manipulate crop plant genes  
363 and promote beneficial rhizosphere interactions. This could occur through breeding, or biotechnology,  
364 and could support the sustainable intensification of global agriculture, through the rational and  
365 targeted exploitation of crop metabolic potential.

366

## 367 **Materials and Methods**

### 368 **Virus Induced Gene Silencing**

369 *Solanum lycopersicum* (cv. Moneymaker) seedlings were sterilised by rinsing in 1% sodium  
370 hypochlorite (from a diluted commercial bleach) for no more than 1 minute. Seeds were then rinsed  
371 in sterile ddH<sub>2</sub>O three times for no more than 2 minutes per wash. ddH<sub>2</sub>O was removed and seeds

372 were sown on 0.5x MS agar plates (half strength Murashige and Skoog (MS) basal salt mixture, 2 mM  
373 Morpholinoethanesulfonic acid (MES), 1.5% agar (w/v), pH 5.7). Seeds were stratified at 4°C for 48 h  
374 in darkness before transfer to 23°C with 16 h of white light (140 – 160  $\mu\text{E}\cdot\text{m}^{-1}\cdot\text{s}^{-1}$ )/8 h. Seedlings were  
375 transferred to John Innes number 2 compost upon cotyledon emergence.

376 The tobacco rattle virus (TRV) VIGS vector, pTRV2, was modified to contain a 200 bp fragment  
377 of the tomato *PDS* gene (Solyc03g123760; pTRV2-*PDS*). We used a co-silencing system as previously  
378 described (Orzaez et al., 2009 ; Stratmann & Hind, 2011), by generating pTRV2-*PDS-ABC-C6* and  
379 pTRV2-*PDS-ABC-G33* plasmids containing contiguous 200 bp fragments of the *PDS* gene sequence,  
380 followed by 200 bp of the gene of interest (either *ABC-C6* [Solyc08g006880] or *ABC-G33*  
381 [Solyc01g101070]). *Agrobacterium tumefaciens* strain GV3101 was used for VIGS throughout. *A.*  
382 *tumefaciens* cultures were transformed by electroporation, and stored as single use glycerol stocks.  
383 Briefly, 30 ng plasmid was added to 50  $\mu\text{l}$  thawed electro-competent *A. tumefaciens* cells on ice, and  
384 then gently mixed by pipette. A single pulse of 2.2 kV was delivered to bacteria in a pre-chilled 1 mm  
385 gap cuvette. Cells were suspended in 1 ml LB broth, and incubated at 28°C for two hours at 200 rpm,  
386 before plating 50  $\mu\text{l}$  on LB agar plates with 50  $\mu\text{g}/\text{ml}$  kanamycin and 50  $\mu\text{g}/\text{ml}$  gentamycin. Colonies  
387 were screened for successful transformation by colony PCR using universal pTRV backbone primers  
388 (see Table 1). Plants were inoculated with pTRV1/pTRV2 on the third day after transfer, between 2 –  
389 4pm. From this point, plants were covered with a foil-lined propagator (to maintain humidity) for  
390 approximately 18 h at 18°C; the lower temperature is necessary to promote VIGS efficacy.

391

#### 392 **Preparation of *A. tumefaciens* cultures for tomato inoculation**

393 For each construct, a single use glycerol stock was thawed and inoculated into 5 ml of LB broth  
394 containing 50  $\mu\text{g}/\text{ml}$  kanamycin and 50  $\mu\text{g}/\text{ml}$  gentamycin. pTRV1 was divided into two cultures (2 x 5  
395 ml). Cultures were then incubated in darkness for 24-48 h at 28°C, with orbital agitation at 180 rpm,  
396 to an  $\text{OD}_{600}$  of between 0.75 – 1. *A. tumefaciens* cultures were then diluted to a total volume of 50 ml  
397 containing 50  $\mu\text{g}/\text{ml}$  kanamycin and 50  $\mu\text{g}/\text{ml}$  gentamycin, 10 mM MES, and 20  $\mu\text{M}$  acetosyringone.  
398 Cultures were then incubated for 24 h at 28°C, with orbital agitation at 180 rpm, after which they were  
399 normalised to an  $\text{OD}_{600}$  of 1 in infiltration buffer (200  $\mu\text{M}$  acetosyringone, 10 mM MES, 10 mM  $\text{MgCl}_2$ ,  
400 pH 5.7). Cultures were covered with foil and incubated for 3 h at room temperature. Immediately  
401 before topical application, a pTRV1 culture was mixed in a 1:1 v/v ratio with pTRV2, pTRV2-*PDS*,  
402 pTRV2-*PDS-ABC-C6*, or pTRV2-*PDS-ABC-G33*, as appropriate. Silwet-L77 was then added to a final  
403 concentration of 0.02%. No Silwet-L77 was added for the blunt syringe leaf infiltration method.

404

#### 405 **Leaf infiltration and topical application methods**

406 Prior to inoculation, the plants were watered to approximately 0.7 Field Capacity (FC). Leaf infiltration  
407 by blunt syringe was conducted as previously described, with a total volume of 0.1 ml injected per  
408 plant (Liu et al., 2002 ; Senthil-Kumar & Mysore, 2014). For topical application, 0.02% Silwett was  
409 added to the cultures immediately prior to application. An autoclaved paintbrush (size 10) was used  
410 to apply the culture across both abaxial and adaxial surfaces of the cotyledons, as well as the  
411 hypocotyl. Five strokes were administered to each seedling with a freshly inoculated paintbrush.  
412 Inoculated plants were maintained at 18°C, and covered with a foil-lined propagator for approximately  
413 18 h. The propagator lid was then removed, and routine maintenance resumed at 18°C with a 16 h  
414 light, 8 h dark cycle, as before.

415

#### 416 **Plant phenotype analysis**

417 On the day of *A. tumefaciens* inoculation, and each subsequent day for six days, photographs were  
418 taken of five randomly selected plants in each treatment group to track growth of cotyledons. During  
419 this period cotyledon growth was found to be linear, after which growth begins to plateau and true  
420 leaves emerge. Thus the rate of cotyledon growth can be expressed as a function of  $y = mx + c$ . The  
421 rate of growth of each leaf was used in one-way ANOVA and Tukey's HSD post-hoc tests to compare  
422 treatments. Plants were checked daily for leaf bleaching phenotypes, indicative of PDS co-silencing.  
423 The number of plants with unambiguous bleaching phenotypes were recorded daily and expressed as  
424 a percentage of the total number of plants inoculated.

425

#### 426 **qRT-PCR analysis of gene transcript knockdown**

427 Plants with bleaching phenotypes were removed from their pots and washed thoroughly under  
428 running water to remove soil. Three plants comprised one biological replicate in each treatment group  
429 at the times indicated. The plant tissue was wrapped in tin foil and flash frozen. Tissue was then  
430 crushed with a pestle and mortar into a fine powder. Frozen tissue was transferred to a 1.5 ml plastic  
431 microcentrifuge tube and total RNA was extracted using the Simply RNA Purification kit and Maxwell  
432 16 extraction robot, following the manufacturer's instructions (Promega). 10 µg total RNA was treated  
433 with Turbo DNase according to the manufacturer's instructions (Ambion). 1 µg of purified RNA was  
434 subsequently reverse transcribed into cDNA using the High Capacity RNA-to-cDNA Kit as per  
435 manufacturer's instructions (Applied Biosystems). A reverse transcription reagent (RT<sup>r</sup>) control, and a  
436 reverse transcription minus the reverse transcriptase (RT<sup>-</sup>) control for a randomly selected sample per  
437 batch, were included.

438 cDNA, and controls, were diluted 1/4 using nuclease free water. 2.5 µl template was used for  
439 each qRT-PCR reaction in a total of 12 µl with 666 nM of each primer and 1x SensiFAST SYBR No-ROX

440 mix as per manufacturer's instructions (BIOLINE). Technical PCR reactions for each sample were  
441 performed in triplicate for each target using a Rotorgene Q thermal cycler with the following regime:  
442 [95°C x 10 min, 45 x (95°C x 20s, 60°C x 20s, 72°C x 25s) 72°C x 10 min]. PCR efficiencies of each  
443 amplicon, and the corresponding cT value, were calculated using the Rotorgene Q software. Relative  
444 quantification of each target amplicon was obtained by an augmented comparative Ct method (Pfaffl,  
445 2001), relative to the reference gene EF- $\alpha$  (Solyc06g005060). Ratio-changes in transcript abundance  
446 were calculated relative to pTRV2-PDS treated plants. Data were analysed by one-way ANOVA and  
447 Tukey's HSD post hoc test. Oligonucleotide sequences are listed in Table 1.

448

449 **Table 1. qRT-PCR primer sequences**

| <i>Gene</i>                   | <i>Tomato Gene ID</i> | <i>Primer Sequences (5' – 3')</i>                       |
|-------------------------------|-----------------------|---------------------------------------------------------|
| <i>EF-<math>\alpha</math></i> | Solyc06g005060        | F: TACTGGTGGTTTTGAAGCTG<br>R: AACTTCCTTCACGATTTTCATCATA |
| <i>PDS</i>                    | Solyc03g123760        | F: GAAGGCGCTGTCTTATCAGG<br>R: GCTTGCTCCGACAACCTCT       |
| <i>ABC-C6</i>                 | Solyc08g006880        | F: ACACCCTGGTTATATCTGTTTC<br>R: AAAGACCCAGCAAGTAGTTATAG |
| <i>ABC-G33</i>                | Solyc01g101070        | F: GCAATGAGGCCAATGTTAAG<br>R: TTGAAGGTTGTCATGTTCAATG    |
| pTRV1                         |                       | F: GAGGGGAAACAAGCGGTACA<br>R: TACCTCGTCCCAAACAGCC       |
| pTRV2                         |                       | F: ACTCACGGGCTAACAGTGCT<br>R: GACGTATCGGACCTCCACTC      |

450

#### 451 **Exudate collection**

452 Plants were removed from their pots as described above, and cleared of soil by rinsing under running  
453 water. Five plants comprised one biological replicate. Plants were bunched together and their roots  
454 placed inside a 50 ml screw-top centrifuge tube (Corning), containing 10 ml ddH<sub>2</sub>O. Plants were  
455 maintained under a standard 16 h light, 8 h dark regime at 18°C for the duration of exudate collection.  
456 After 24 h, at around 1 pm, plants were removed from the tubes and the exudate was passed through  
457 a 0.22  $\mu$ M filter to remove root border cells and residual soil. Soil control samples (approximately 1 g  
458 soil in 10 ml 0.22  $\mu$ M filtered ddH<sub>2</sub>O) were processed in the same way. For chemosensory and hatching  
459 experiments, exudate was stored in centrifuge tubes at 4°C in darkness until use. For GC-MS  
460 metabolomics, exudates were stored at -80°C immediately after filtering.

461

#### 462 **Non-targeted exudate metabolite profiling by GC-MS**

463 Root exudates were freeze dried in batches and stored at  $-80^{\circ}\text{C}$  until all samples had been processed  
464 ( $n = 40$ ; 10 biological replicates for each treatment group). Samples were extracted with GC-grade  
465 dichloromethane (1 mL) (Sigma–Aldrich, St. Louis, MO, USA), vortexed for 10 s, sonicated for 5 min,  
466 and centrifuged at 14,000 rpm for 5 min. The organic phase was dried over anhydrous  $\text{Na}_2\text{SO}_4$ ,  
467 concentrated to 50  $\mu\text{L}$  under a gentle stream of  $\text{N}_2$  and then analysed (1.0  $\mu\text{L}$ ) by GC-MS on a 7890A  
468 gas chromatograph linked to a 5975 C mass selective detector (Agilent Technologies, Inc., Santa Clara,  
469 CA, USA). The GC was fitted with a HP5 MS low bleed capillary column (30 m  $\times$  0.25 mm i.d., 0.25  $\mu\text{m}$ )  
470 (J&W, Folsom, CA, USA). Helium at a flow rate of 1.25 ml  $\text{min}^{-1}$  served as the carrier gas. The oven  
471 temperature was programmed from 35 to  $285^{\circ}\text{C}$  with the initial temperature maintained for 5 min  
472 then  $10^{\circ}\text{C min}^{-1}$  to  $280^{\circ}\text{C}$ , held at this temperature for 20.4 min. The mass selective detector was  
473 maintained at ion source temperature of  $230^{\circ}\text{C}$  and a quadrupole temperature of  $180^{\circ}\text{C}$ . Electron  
474 impact (EI) mass spectra were obtained at the acceleration energy of 70 eV. Fragment ions were  
475 analyzed over 40–550  $m/z$  mass range in the full scan mode. The filament delay time was set at 3.3  
476 min. A HP Z220 SFF intel xeon workstation equipped with ChemStation B.02.02. acquisition software  
477 was used. The mass spectrum was generated for each peak using Chemstation integrator set as  
478 follows: initial threshold = 5, initial peak width = 0.1, initial area reject = 1 and shoulder detection =  
479 on. The compounds were identified by comparison of mass spectrometric data and retention times  
480 with those of authentic standards and reference spectra published by library–MS databases: National  
481 Institute of Standards and Technology (NIST) 05, 08, and 11.

482

### 483 **Nematode culture and maintenance**

484 *Meloidogyne* nematode species were maintained on *S. lycopersicum* (cv. Moneymaker). Four-week  
485 old plants were infected with 1,000 J2s. Eggs were extracted eight weeks post infection by first gently  
486 rinsing the root tissue free of soil and placing the tissue in a 500 ml Duran bottle. Tissue was then  
487 rinsed in 50% bleach for no more than one minute, and then in water, pouring the liquid through  
488 nested 180  $\mu\text{M}$ , 150  $\mu\text{M}$ , and 38  $\mu\text{M}$  sieves arranged from largest pore size to smallest on the bottom.  
489 For maximum recovery, plant material was then crushed by hand and rinsed in water through the  
490 sieves. Eggs collected in the bottom sieve were pelleted and re-suspended in saturated sucrose. 1 ml  
491  $\text{ddH}_2\text{O}$  was added to the solution, and eggs were collected by flotation in the water layer by  
492 centrifugation at 2000 rpm for 2 minutes. Eggs were collected and placed in a fine mesh filter hatchery  
493 (pore size 38  $\mu\text{m}$ ) in 5 ml spring water (autoclaved and sterilised by 0.22  $\mu\text{m}$  filter). 50  $\mu\text{L}$  antibiotic /  
494 antimycotic solution (Sigma) was added and eggs were incubated at  $23^{\circ}\text{C}$ . Freshly hatched J2s were  
495 collected every second or third day in hydrophobically lined microcentrifuge tubes for use in  
496 chemosensory and infection assays within 48 h of hatch.

497 *Globodera pallida* (pathotype PA2/3) cysts were reared on field grown potatoes (cv. Desiree).  
498 Two 10 week-old tomato (cv. Moneymaker) plants were grown under greenhouse conditions. 1 L  
499 ddH<sub>2</sub>O was poured into the soil and root stock of each pot, and collected after passing through the  
500 pot. Additional ddH<sub>2</sub>O was poured through the pots until the total collection volume reached 1 L. The  
501 collected exudate solution was passed through a 0.22 µm filter and stored in glass jars at 4°C until use.  
502 For chemosensory assays and infection assays, *G. pallida* cysts were hatched in 1:1 (v/v) tomato  
503 exudate diluted in ddH<sub>2</sub>O and collected at two to three-day intervals in hydrophobically lined  
504 microcentrifuge tubes.

505

#### 506 **Soil infection assays**

507 Tomato plants exhibiting the co-silenced leaf bleaching phenotype were selected at around 21 days  
508 post inoculation, and then challenged with 250 J2s. All treatments were blinded from this stage. Six  
509 weeks after J2 inoculation, galls and cysts could be identified. These were counted for each  
510 experimentally infected plant.

511

#### 512 **PPN chemosensory assays**

513 Chemosensory assays were conducted as before (Warnock et al., 2016; 2017) by making a solid agar  
514 base (3 ml of 1.5% (w/v) agar) in a 60 mm Petri dish. 3 ml of smooth 0.5% (w/v) agar slurry was then  
515 poured on top of the solid base. Slurry was prepared by continuous mixing of liquid 0.5% agar until  
516 fully cooled. Approximately 150 J2s were then added to the centre of the arena under a microscope.  
517 Plates were covered and left in darkness at room temperature (20°C) overnight on a vibration free  
518 bench (for approx. 16 h). The numbers of nematodes observed in the different regions of the arena  
519 were then counted under a light microscope. The chemosensory index of each assay was calculated  
520 as before (Warnock et al., 2016; 2017).

521

#### 522 **PPN egg hatching assays**

523 Tomato root exudate (collected as described above) was diluted in a 1:1 ratio with ddH<sub>2</sub>O. 500 µl of  
524 diluted exudate was dispensed into wells of a 24-well culture plate. To each exudate sample, between  
525 15 and 20 *G. pallida* cysts were added. Four biological replicates were prepared for each treatment  
526 group. The spaces between wells were half filled with ddH<sub>2</sub>O and the plates wrapped in parafilm to  
527 reduce evaporation and changes of volume throughout the experiment. Plates were incubated at 17°C  
528 for 21 days. Each well was checked daily for signs of nematode emergence. Following the first day of  
529 emergence, J2s were counted every 48 h. After approximately 3 weeks, the remaining unhatched eggs  
530 / J2s were counted in order to obtain a cumulative percentage hatch rate for each exudate sample.

531 The number of emerging J2s at each time point was converted to a cumulative percentage, which was  
532 plotted against time as previously described (Campbell & Madden, 1990).

533 2000 freshly extracted *M. incognita* or *M. javanica* eggs were incubated in 500 µl of  
534 experimental plant root exudates. The ratio of unhatched to hatched J2s was then recorded every  
535 second or third day. These ratio values were converted into percentages and plotted relative to time,  
536 as previously described. For each batch of eggs, triplicate counts of unhatched and hatched J2s were  
537 made. Four experimental replicates were used to calculate means.

538

### 539 **Microbe chemotaxis assays**

540 Microbial chemotaxis assays were conducted broadly as in Allard-Massicotte et al. (2016). *B. subtilis*  
541 (168) and *A. tumefaciens* (AGL-1) were inoculated onto LB agar plates and spread to single colonies.  
542 One day-old colonies were inoculated into 3 ml LB broth and orbitally rotated at 180 rpm, overnight  
543 (28°C for *A. tumefaciens* and 37°C for *B. subtilis*). Cultures were pelleted at 8,000 rpm for 10 min, and  
544 the cells were washed in 1.5 ml chemotaxis buffer (10 mM Potassium Phosphate Buffer, pH 7.0), 0.1  
545 mM EDTA, 0.05% glycerol, 5 mM Sodium-d,l-Lactate, 0.14 mM CaCl<sub>2</sub>, 0.3mM (NH<sub>4</sub>)<sub>2</sub>SO<sub>4</sub>). Cells were  
546 collected by centrifugation and subsequently re-suspended in fresh chemotaxis buffer to an OD<sub>600</sub> of  
547 0.002. 200 µl of cell suspension was added to each well of a 96-well plate; ten replicates for each  
548 experimental group.

549 1 µl microcapillary tubes (Sigma-Aldrich) were filled with either: (i) experimental root  
550 exudates (*ABC-C6*, *ABC-G33*, or *PDS*), (ii) positive (1 mM malic acid), or negative (ddH<sub>2</sub>O) controls.  
551 Loaded microcapillary tubes were placed into the cell suspension wells of the 96-well plate for 1 h,  
552 and maintained at 23°C. During this time, planktonic *B. subtilis* or *A. tumefaciens* cells could migrate  
553 towards, and into, the microcapillary tube. Following the 1 h assay timecourse, the capillary tubes  
554 were removed. Excess cell suspension was removed from the outside of each capillary tube by rinsing  
555 briefly with ddH<sub>2</sub>O. The 1 µl content of each capillary tube was ejected into 99 µl of chemotaxis buffer  
556 by positive pressure. 20 µl of each solution was spread onto a 1.5% LB agar plate. LB plates were sealed  
557 with parafilm, and incubated at 28°C for *A. tumefaciens*, or 37°C for *B. subtilis* for 48 h. Colony forming  
558 units were counted for each replicate plate.

559

### 560 **Acknowledgements**

561 VIGS plasmids pTRV1 and pTRV2 were kindly provided by Prof. Ian Graham, University of York. *A.*  
562 *tumefaciens* AGL-1 was provided by Dr Vladimir Nekrasov, Rothamsted Research. *A. tumefaciens*  
563 strain GV3101 was provided by Dr Penny Hirsch, Rothamsted Research.

564



## 565 **References**

- 566 Adebessin F, Widhalm JR, Boachon B, Lefèvre F, Pierman B, Lynch JH, Alam I, Junqueir B, Benke R, Ray  
567 S, Porter JA, Yanagisawa M, Wetzstein HY, Morgan JA, Boutry M, Schuurink RC, Dudareva N (2017).  
568 Emission of volatile organic compounds from petunia flowers is facilitated by an ABC transporter.  
569 Science, 356(6345): 1386-1388. <https://doi.org/10.1126/science.aan0826>  
570
- 571 Allard-Massicotte R, Tessier L, Lecuyer F, Lakshmanan V, Lucier JF, Garneau D, Caudwell L, Vlamakis H,  
572 Bais HP, Beaugregard PB (2016). *Bacillus subtilis* early colonization of *Arabidopsis thaliana* roots  
573 involves multiple chemotaxis receptors. MBio 7(6): e01664-16. [https://doi.org/10.1128/mBio.01664-](https://doi.org/10.1128/mBio.01664-16)  
574 [16](https://doi.org/10.1128/mBio.01664-16)  
575
- 576 Ahkami AH, White RA, Handakumbura PP, Jansson C (2017). Rhizosphere engineering: enhancing  
577 sustainable plant ecosystem productivity. Rhizosphere, 3(2): 233-243.  
578 <https://doi.org/10.1016/j.rhisph.2017.04.012>  
579
- 580 Badri DV, Loyola-Vargas VM, Broeckling CD, De-la-Pena C, Jasinski M, Santelia D, Martinoia E, Sumner  
581 LW, Banta LM, Stermitz F, Vivanco JM (2008). Altered profile of secondary metabolites in the root  
582 exudates of Arabidopsis ATP-Binding Cassette (ABC) transporter mutants. Plant Physiol. 146(2): 762–  
583 771. <https://doi.org/10.1104/pp.107.109587>  
584
- 585 Badri DV, Quintana N, El Kassis EG, Kim HK, Choi YH Sugiyama A, Verpoorte R, Martinoia E, Manter DK,  
586 Vivanco JM (2009). An ABC transporter mutation alters root exudation of phytochemicals that provoke  
587 an overhaul of natural soil microbiota. Plant Physiol. 151(4):2006-2007.  
588 <https://doi.org/10.1104/pp.109.147462>  
589
- 590 Berendsen RL, Pieterse CMJ and Bakker PAHM (2012). The rhizosphere microbiome and plant health.  
591 Trends in Plant Sci 17(8): 478-486. <https://doi.org/10.1016/j.tplants.2012.04.001>  
592
- 593 Bertin C, Yang XH, Weston LA (2003). The role of root exudates and allelochemicals in the rhizosphere.  
594 Plant Soil 256, 67–83. <https://doi.org/10.1023/A:1026290508166>  
595
- 596 Bowsher AW, Ali R, Harding SA, Tsai CJ, Donovan LA (2016). Evolutionary divergences in root exudate  
597 composition among ecologically-contrasting Helianthus species. PLoS One 11(1): e1048280.  
598 <https://doi.org/10.1371/journal.pone.0148280>

599

600 Bulgarelli D, Garrido-Oter R, Munch PC, Weiman A, Droge J, Pan Y, McHardy AC, Schulze-Lefert P  
601 (2015). Structure and function of the bacterial root microbiota in wild and domesticated barley. Cell  
602 Host Microbe. 17(3): 392-403. <https://doi.org/10.1016/j.chom.2015.01.011>

603

604 Byrne JT, Maher NJ, Jones PW (2001). Comparative responses of *Globodera rostochiensis* and *G.*  
605 *pallida* to hatching chemicals. J Nematol 33(4): 195-202. DOI not available.

606

607 Campbell CL, Madden LV (1990). Introduction to Plant Disease Epidemiology. John Wiley & Sons, New  
608 York. ISBN: 0471832367.

609

610 Chaparro JM, Badri DV, Bakker MG, Sugiyama A, Manter DK, Vivanco JM (2013). Root exudation of  
611 phytochemicals in *Arabidopsis* follows specific patterns that are developmentally programmed and  
612 correlate with soil microbial functions. PLoS ONE 8(8): <https://doi.org/10.1371/journal.pone.0055731>

613

614 Cieslinksi G, Van Rees CJ, Szmigielska AM, Huang PM (1997). Low molecular weight organic acids  
615 released from roots of durum wheat and flax into sterile nutrient solutions. J Plant Nutr 20: 753–764.  
616 <https://doi.org/10.1080/01904169709365291>

617

618 Davies LJ, Elling AA (2015). Resistance genes against plant-parasitic nematodes: a durable control  
619 strategy? Nematology 17(3): <https://doi.org/10.1163/15685411-00002877>

620

621 De Andrade LRM, Ikeda M, do Amaral LIV, Ishizuka J (2011). Organic acid metabolism and root  
622 excretion of malate in wheat cultivars under aluminium stress. Plant Physiol Biochem 49(1): 55-60.  
623 <https://doi.org/10.1016/j.plaphy.2010.09.023>

624

625 Dessaux Y, Grandclement C, Faure D (2016). Engineering the rhizosphere. Trends in Plant Sci 21(3):  
626 266-278. <https://doi.org/10.1016/j.tplants.2016.01.002>

627

628 de Weert S, Vermeiren H, Mulders IH, Kuiper I, Hendrickx N, Bloemberg GV, Vanderleyden J, De Mot  
629 R, Lugtenberg BJ (2002). Flagella-driven chemotaxis towards exudate components is an important trait  
630 for tomato root colonization by *Pseudomonas fluorescens*. Mol Plant Microbe Interact 15(11): 1173-  
631 80. <https://doi.org/10.1094/MPMI.2002.15.11.1173>

632

633 Dubreuil G, Magliano M, Dubrana MP, Lozano J, Lecomte P, Favery B, Abad P, Rosso MN (2009).  
634 Tobacco rattle virus mediates gene silencing in a plant parasitic root-knot nematode. *J Exp Bot* 60(14):  
635 4041-4050. <https://doi.org/10.1093/jxb/erp237>  
636  
637 Duarte A, Maleita C, Abrantes I, Curtis R (2015). Tomato root exudates induce transcriptional changes  
638 of *Meloidogyne hispanica* genes. *Phytopathol Mediterr* 54: 1, 104-108.  
639 [https://doi.org/10.14601/Phytopathol\\_Mediterr-14595](https://doi.org/10.14601/Phytopathol_Mediterr-14595)  
640  
641 Fletcher JS, Hegde RS (1995). Release of phenols by perennial plant roots and their potential  
642 importance in bioremediation. *Chemosphere* 31(4): 3009-3016. [https://doi.org/10.1016/0045-](https://doi.org/10.1016/0045-6535(95)00161-Z)  
643 [6535\(95\)00161-Z](https://doi.org/10.1016/0045-6535(95)00161-Z)  
644  
645 Fudali SL, Wang C, Williamson VM (2013). Ethylene signaling pathway modulates attractiveness of  
646 host roots to the root-knot nematode *Meloidogyne hapla*. *Mol Plant Microbe Interact* 26(1): 75-86.  
647 <https://doi.org/10.1094/MPMI-05-12-0107-R>  
648  
649 Giles CD, Brown LK, Adu MO, Mezeli MM, Sandral GA, Simpson RJ, Wendler E, Shand CA, Menezes-  
650 Blackburn D, Darch T, Stutter MI, Lumsdon DG, Zhang H, Blackwell MSA, Wearing C, Cooper P,  
651 Havgarth PM, George TS (2017). Response-based selection of barley cultivars and legume species for  
652 complementarity: Root morphology and exudation in relation to nutrient source. *Plant Sci* 255: 12-28.  
653 <https://doi.org/10.1016/j.plantsci.2016.11.002>  
654  
655 Gobena D, Shimels M, Rich PJ, Ruyter-Spira C, Bouwmeester H, Kanuganti S, Mengiste T, Ejeta G  
656 (2017). Mutation in sorghum LOW GERMINATION STIMULANT 1 alters strigolactones and causes *Striga*  
657 resistance. *PNAS* 114(17): 4471-4476. <https://doi.org/10.1073/pnas.1618965114>  
658  
659 Hiltbold I, Baroni M, Toepfer S, Kuhlmann U, Turlings TCJ (2010). Selection of entomopathogenic  
660 nematodes for enhanced responsiveness to a volatile root signal helps to control a major root pest.  
661 *J Exp Biol* 213: 2417-2423. <https://doi.org/10.1242/jeb.041301>  
662  
663 Hubbard CJ, Li B, McMinn R, Brock MT, Maignien L, Ewers BE, Kliebenstein D, Weinig C (2018). The  
664 effect of rhizosphere microbes outweighs host plant genetics in reducing insect herbivory. *Mol Ecol in*  
665 *press* <https://doi.org/10.1111/mec.14989>  
666

667 Hu Y, You J, Li C, Williamson VM, Wang C (2017). Ethylene response pathway modulates attractiveness  
668 of plant roots to soybean cyst nematode *Heterodera glycines*. *Sci Rep* 7: 41282.  
669 <https://doi.org/10.1038/srep41282>  
670

671 Hwang J-U, Song W-Y, Hong D, Ko D, Yamaoka Y Jang S, Yim S, Lee E, Khare D, Kim K, Palmgren M, Yoon  
672 HS, Martinoia E, Lee Y (2016). Plant ABC transporters enable many unique aspects of a terrestrial  
673 plant's lifestyle. *Mol Plant* 9(3): 338-355. <https://doi.org/10.1016/j.molp.2016.02.003>  
674

675 Iannucci A, Fragasso M, Beleggia R, Nigro F, Papa R (2017). Evolution of the crop rhizosphere: impact  
676 of domestication on root exudates in tetraploid wheat (*Triticum turgium* L.). *Front Plant Sci* 8: 2124.  
677 <https://doi.org/10.3389/fpls.2017.02124>  
678

679 Jamil M, Charnikhova T, Houshyani B, van Ast A, Bouwmeester HJ (2012). Genetic variation in  
680 strigolactone production and tillering in rice and its effect on *Striga hermonthica* infection. *Planta*  
681 235(3): 473-484. <https://doi.org/10.1007/s00425-011-1520-y>  
682

683 Jones JT, Haegeman A, Danchin EGJ, Gaur HS, Helder J, Jones MGK, Kikuchi T, Manzanilla-Lopez R,  
684 Palomares-Ruis JE, Wesemael WML, Perry RN (2013). Top 10 plant-parasitic nematodes in molecular  
685 plant pathology. *Mol Plant Pathol* 14(9): 946–961. <https://doi.org/10.1111/mpp.12057>  
686

687 Jones DL, Nguyen C, Finlay RD (2009). Carbon flow in the rhizosphere: carbon trading at the soil-root  
688 interface. *Plant Soil* 321, 5–33. <https://doi.org/10.1007/s11104-009-9925-0>  
689

690 Kesel S, Grumbein S, Gumperlein I, Tallawi M, Marel A-K, Lieleg O, Opitz M (2016). Direct comparison  
691 of physical properties of *Bacillus subtilis* NCIB 3610 and B-1 biofilms. *Appl Environ Microbiol* 82: 2424–  
692 2432. <https://doi.org/10.1128/AEM.03957-15>  
693

694 Kihika R, Murungi LK, Coyne D, Ng'ang'a M, Hassanali A, Teal PEA, Torto B (2017). Parasitic nematode  
695 *Meloidogyne incognita* interactions with different *Capsicum annum* cultivars reveal the chemical  
696 constituents modulating root herbivory. *Sci Rep* 7: 2903. [https://doi.org/10.1038/s41598-017-02379-](https://doi.org/10.1038/s41598-017-02379-8)  
697 [8](https://doi.org/10.1038/s41598-017-02379-8)  
698

- 699 Kim B, Song GC, Ryu CM (2016). Root exudation by aphid leaf infestation recruits root-associated  
700 *Paenibacillus* spp. to lead plant insect susceptibility. J Microbiol Biotechnol 26(3): 549-57.  
701 <https://doi.org/10.4014/jmb.1511.11058>  
702
- 703 Kirwa HK, Murungi LK, Beck JJ, Torto B (2018). Elicitation of Differential Responses in the Root-Knot  
704 Nematode *Meloidogyne incognita* to Tomato Root Exudate Cytokinin, Flavonoids, and Alkaloids. J  
705 Agric Food Chem 66(43): 11291–11300. <https://doi.org/10.1021/acs.jafc.8b05101>  
706
- 707 Lane TS, Rempe CS, Davitt J, Staton ME, Peng Y, Soltis DE, Melkonian M, Deyholos M, Leebens-Mack  
708 JH, Chase M, Rothfels CJ, Stevenson D, Graham SW, Yu J, Liu T, Pires JC, Edger PP, Zhang Y, Xie Y, Zhu  
709 Y, Carpenter E, Wong GK-S, Stewart CN (2016). Diversity of ABC transporter genes across the plant  
710 kingdom and their potential utility in biotechnology. BMC Biotechnol 16(1): 47.  
711 <https://doi.org/10.1186/s12896-016-0277-6>  
712
- 713 Li B, Li YY, Zhang FF, Li CJ, Li XX, Lambers H, Li L (2016). Root exudates drive interspecific facilitation by  
714 enhancing nodulation and N<sub>2</sub> fixation. PNAS 113(23): 6496-501.  
715 <https://doi.org/10.1073/pnas.1523580113>  
716
- 717 Liu G, Sanches-Fernandez R, Li Z-S, Rea PA (2001). Enhanced multispecificity of *Arabidopsis* vacuolar  
718 multidrug resistance-associated protein-type ATP-binding cassette transporter, AtMRP2. J Biol Chem  
719 276: 8648–8656. <https://doi.org/10.1074/jbc.M009690200>  
720
- 721 Lu T, Ke M, Lavoie M, Jin Y, Fan X, Zhang Z, Fu Z, Sun L, Gillings M, Penuelas J, Qian H, Zhu YG (2018).  
722 Rhizosphere microorganisms can influence the timing of plant flowering. Microbiome 6(1): 231.  
723 <https://doi.org/10.1186/s40168-018-0615-0>  
724
- 725 Marschner H (1995). Mineral nutrition of higher plants (2nd Edition). Academic Press. ISBN:  
726 9780124735439.  
727
- 728 Martinoia E, Meyer S, De Angeli A, Nagy R (2012). Vacuolar transporters in their physiological context.  
729 Annu Rev Plant Biol 63: 183-213. <https://doi.org/10.1146/annurev-arplant-042811-105608>  
730

- 731 Meyer RS, Duval AE, Jensen HR (2012). Patterns and processes in crop domestication: an historical  
732 review and quantitative analysis of 203 global food crops. *New Phytol* 196(1): 29-48.  
733 <https://doi.org/10.1111/j.1469-8137.2012.04253.x>  
734
- 735 Micallef SA, Shiaris MP, Colon-Carmona A (2009). Influence of *Arabidopsis thaliana* accessions on  
736 rhizobacterial communities and natural variation in root exudates. *J Exp Bot* 60: 1729–1742.  
737 <https://doi.org/10.1093/jxb/erp053>  
738
- 739 Mitchum MG, Hussey RS, Baum TJ, Wang X, Elling AA, Wubben M, Davis EL (2013). Nematode effector  
740 proteins: an emerging paradigm of parasitism. *New Phytol* 199: 879-894.  
741 <https://doi.org/10.1111/nph.12323>  
742
- 743 Mohamed N, Charnikhova T, Fradin EF, Rienstra J, Babiker AGT, Bouwmeester HJ (2018). Genetic  
744 variation in *Sorghum bicolor* strigolactones and their role in resistance against *Striga hermonthica*. *J*  
745 *Exp Bot* <https://doi.org/10.1093/jxb/ery041>  
746
- 747 Mohamed N, Charnikhova T, Bakker EJ, van Ast A, Babiker AG, Bouwmeester HJ (2016). Evaluation of  
748 field resistance to *Striga hermonthica* (Del.) Benth. In *Sorghum bicolor* (L.) Moench. The relationship  
749 with strigolactones. *Pest Manag Sci* 71(11): 2082-2090. <https://doi.org/10.1002/ps.4426>  
750
- 751 Monchgesang S, Strehmel N, Trutschel D, Westphal L, Neumann S, Scheel D (2016). Plant to plant  
752 variability in root metabolite profiles of 19 *Arabidopsis thaliana* accessions is substance-class-  
753 dependent. *Int J Mol Sci* 17(9): E1565. <https://doi.org/10.3390/ijms17091565>  
754
- 755 Monchgesang S, Strehmel N, Schmidt S, Westphal L, Taruttis F, Muller E, Herklotz S, Neumann S, Scheel  
756 D (2017). Natural variation of root exudates in *Arabidopsis thaliana*-linking metabolomic and genomic  
757 data. *Sci Rep* 6, Article number: 29033. <https://doi.org/10.1038/srep29033>  
758
- 759 Morris R, Wilson L, Warnock ND, Carrizo D, Cox D, Sturrock M, Maule AG, Dalzell JJ (2017). A  
760 neuropeptide modulates sensory perception in the entomopathogenic nematode *Steinernema*  
761 *carpocapsae*. *PLoS Pathog* 13(3): e1006185. <https://doi.org/10.1371/journal.ppat.1006185>  
762

- 763 Murungi LK, Kirwa H, Coyne D, Teal PEA, Beck JJ, Torto B (2018). Identification of key root volatiles  
764 signaling preference of tomato over spinach by the root knot nematode *Meloidogyne incognita*. J Agric  
765 Food Chem 66: 7328-7336. <https://doi.org/10.1021/acs.jafc.8b03257>  
766
- 767 Nicol JM, Stirling GR, Turner SJ, Coyne DL, de Nijs L, Hockland S, Maafi ZT (2011). Current nematode  
768 threats to world agriculture. Genomics and Molecular Genetics of Plant-Nematode Interactions (Jones  
769 JT, Gheysen G, Fenoll C., eds). Heidelberg: Springer pp. 21–44. [https://doi.org/10.1007/978-94-007-](https://doi.org/10.1007/978-94-007-0434-3_2)  
770 [0434-3\\_2](https://doi.org/10.1007/978-94-007-0434-3_2)  
771
- 772 Ofori PA, Mizuno A, Suzuki M, Martinoia E, Reuscher S, Aoki K, Shibata D, Otagaki S, Matsumoto S,  
773 Shiratake K (2018). Genome-wide analysis of ATP binding cassette (ABC) transporters in tomato. PLoS  
774 ONE 13(7): e0200854. <https://doi.org/10.1371/journal.pone.0200854>  
775
- 776 Palomares-Rius JE, Hedley P, Cock PJA, Morris JA, Jones JT, Blok VC (2016). Gene expression changes  
777 in diapause or quiescent potato cyst nematode, *Globodera pallida*, eggs after hydration or exposure  
778 to tomato root diffusate. PeerJ 4: e1654. <https://doi.org/10.7717/peerj.1654>  
779
- 780 Rossi A, Kontarakis Z, Gerri C, Nolte H, Holper S, Kruger M, Stainier DYR (2015). Genetic compensation  
781 induced by deleterious mutations but not gene knockdowns. Nature 524: 230–233.  
782 <https://doi.org/10.1038/nature14580>  
783
- 784 Runyon JB, Mescher MC, De Moraes CM (2006). Volatile chemical cues guide host location and host  
785 selection by parasitic plants. Science 313: 1964-1967. <https://doi.org/10.1126/science.1131371>  
786
- 787 Sasse J, Martinoia E, Northen T (2018). Feed your friends: do plant exudates shape the root  
788 microbiome? Trends in Plant Sci 23(1): 25-41. <https://doi.org/10.1016/j.tplants.2017.09.003>  
789
- 790 Schroeder JI, Delhaize E, Frommer WB, Guerinot ML, Harrison MJ, Herrera-Estrella L, Horie T, Kochian  
791 LV, Munns R, Nishizawa NK, Tsay Y-F, Sanders D (2013). Using membrane transporters to improve crops  
792 for sustainable food production. Nature 497: 60–66. <https://doi.org/doi:10.1038/nature11909>  
793
- 794 Teillet A, Dybal K, Kerry BR, Miller AJ, Curtis RHC, Hedden P (2013). Transcriptional changes of the  
795 root-knot nematode *Meloidogyne incognita* in Response to *Arabidopsis thaliana* root signals. PLoS  
796 ONE 8(4): e61259. <https://doi.org/10.1371/journal.pone.0061259>



797

798 Warnock ND, Wilson L, Canet-Perez JV, Fleming T, Fleming CC, Maule AG, Dalzell JJ (2016). Exogenous  
799 RNA interference exposes contrasting roles for sugar exudation in host-finding by plant pathogens. *Int*  
800 *J Parasitol* 46(8): 473-7. <https://doi.org/10.1016/j.ijpara.2016.02.005>

801

802 Warnock ND, Wilson L, Patten C, Fleming CC, Maule AG, Dalzell JJ (2017). Nematode neuropeptides as  
803 transgenic nematocides. *PLoS Pathog* 13(2): e1006237. <https://doi.org/10.1371/journal.ppat.1006237>

804

805 Waters BM, Amundsen K, Graef G (2018). Gene expression profiling of iron deficiency chlorosis  
806 sensitive and tolerant soybean indicates key roles in phenylpropanoids under alkalinity stress. *Front*  
807 *Plant Sci* 9: 10. <https://doi.org/10.3389/fpls.2018.00010>

808

809 Winzer T, Gazada V, He Z, Kaminski F, Kern M, Larson TR, Meade F, Teodor R, Vaistij FE, Walker C,  
810 Bowser TA, Graham IA (2012). A *Papaver somniferum* 10-gene cluster for synthesis of the anticancer  
811 alkaloid noscapine. *Science* 336: 1704-1708. <https://doi.org/10.1126/science.1220757>

812

813 Xu Y, Miyakawa T, Nosaki S, Nakamura A, Lyu Y, Nakamura H, Ohto U, Ishida H, Shimizu T, Asami T,  
814 Tanokura M (2018). Structural analysis of HTL and D14 proteins reveals the basis for ligand selectivity  
815 in *Striga*. *Nat Commun* 9(1): 3947. <https://doi.org/10.1038/s41467-018-06452-2>

816

817 Yang G, Zhou B, Zhang X, Zhang Z, Wu Y, Zhang Y, et al. Effects of tomato root exudates on *Meloidogyne*  
818 *incognita* (2016). *PLoS ONE* 11(4): e0154675. <https://doi.org/10.1371/journal.pone.0154675>

819

820 Yazaki K (2006). ABC transporters involved in the transport of plant secondary metabolites. *FEBS Lett*  
821 580(4): 1183-91. <https://doi.org/10.1016/j.febslet.2005.12.009>

822

823 Yuan J, Zhang N, Huang Q, Raza W, Li R, Vivanco JM, Shen Q (2015). Organic acids from root exudates  
824 of banana help root colonization of PGPR strain *Bacillus amyloliquefaciens* NJN-6. *Sci Rep* 5: 13438.  
825 <https://doi.org/10.1038/srep13438>

826

827 Zasada IA, Peetz A, Wade N, Navarre RA, Ingham RE (2016). Host status of different potato (*Solanum*  
828 *tuberosum*) varieties and hatching in root exudates of *Globodera ellingtonae*. *J Nematol* 45(3): 195-  
829 201. DOI not available. PMID: 24115784

830

- 831 Zeigler DR, Pragai Z, Rodriguez S, Chevreux B, Muffler A, Albert T, Bai R, Wyss M, Perkins JB (2008).  
832 The origins of 168, W23, and other *Bacillus subtilis* legacy strains. J Bacteriol 190(21): 6983-6995.  
833 <https://doi.org/10.1128/JB.00722-08>  
834  
835 Zwetsloot MJ, Kessler A, Bauerle TL (2018). Phenolic root exudate and tissue compounds vary widely  
836 among temperate forest tree species and have contrasting effects on soil microbial respiration. New  
837 Phytol 218(2): 530-541. <https://doi.org/10.1111/nph.15041>
